# Supplementary material for: Nitrilotriacetic acid-end-functionalized polycaprolactone as a template for polymer–protein nanocarriers
Source: Royal Society of Chemistry journal article supplement (doi:10.1039/c9py01663e), 2020-01-01
Supplement: c9py01663e1.pdf [file c9py01663e1.pdf]

## Supporting information

# Nitrilotriacetic Acid-End-Functionalized Polycaprolactone as a Template for Polymer-Protein Nanocarrier

*Leeja Jose,<sup>a,†</sup> A Ran Hwang,<sup>a,†</sup> Chaeyeon Lee,<sup>a</sup> KyuHwan Shim,<sup>b</sup> Jae Kwang Song,<sup>b</sup> Seong Soo A.An<sup>c,\*</sup> and Hyun-jong Paik<sup>a,\*</sup>*

### Table of content

|                                                                |          |
|----------------------------------------------------------------|----------|
| <sup>1</sup> H-NMR spectra of NTA-amine                        | <b>2</b> |
| SEC of pNTA-PCL                                                | <b>3</b> |
| IR spectra of polymers                                         | <b>3</b> |
| PL analysis of GFP/PCL after bioconjugation                    | <b>4</b> |
| Response of GFP/PCL in excess imidazole conditions             | <b>4</b> |
| Size controllability of GFP/PCL with polymer concentration     | <b>5</b> |
| Stability study of GFP/PCL/DOX nanoparticles in PBS            | <b>5</b> |
| Standard curve plotted with emission intensity of DOX solution | <b>6</b> |
| Characterization of GFP/PCL/Nile red nanoparticles             | <b>6</b> |
| DLS study of GFP/PCL/DOX at different PH environment           | <b>7</b> |
| Fluorescent intensity of samples by FACS analysis.             | <b>8</b> |

## Characterization of materials

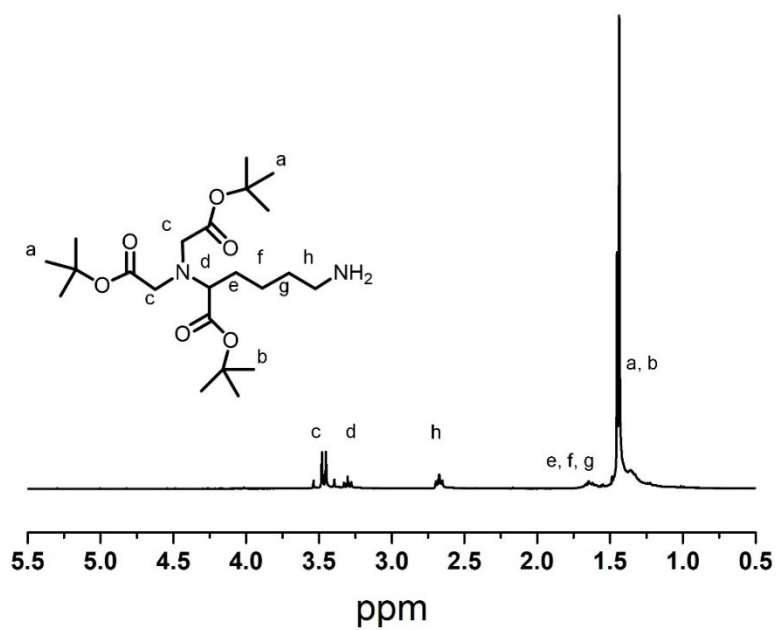

**Figure S1.**  $^1\text{H}$  NMR spectra of NTA-amine.

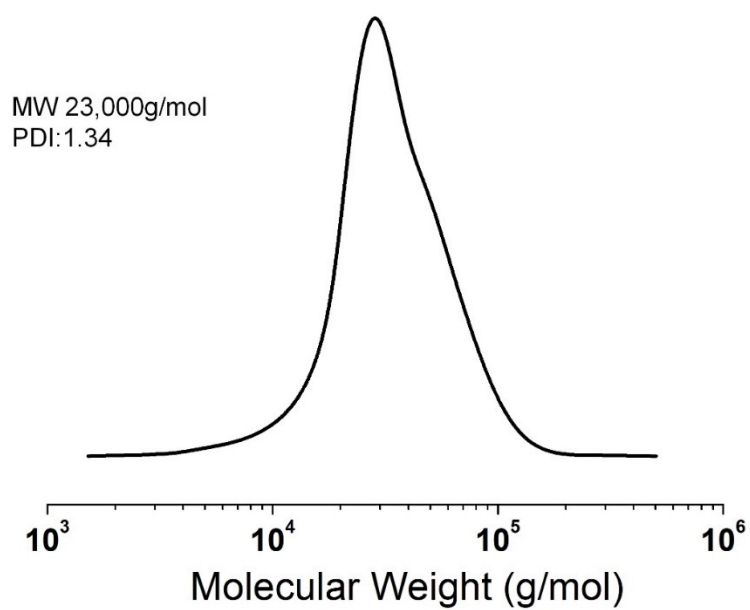

**Figure S2.** Size exclusion chromatogram of *p*NTA-PCL.

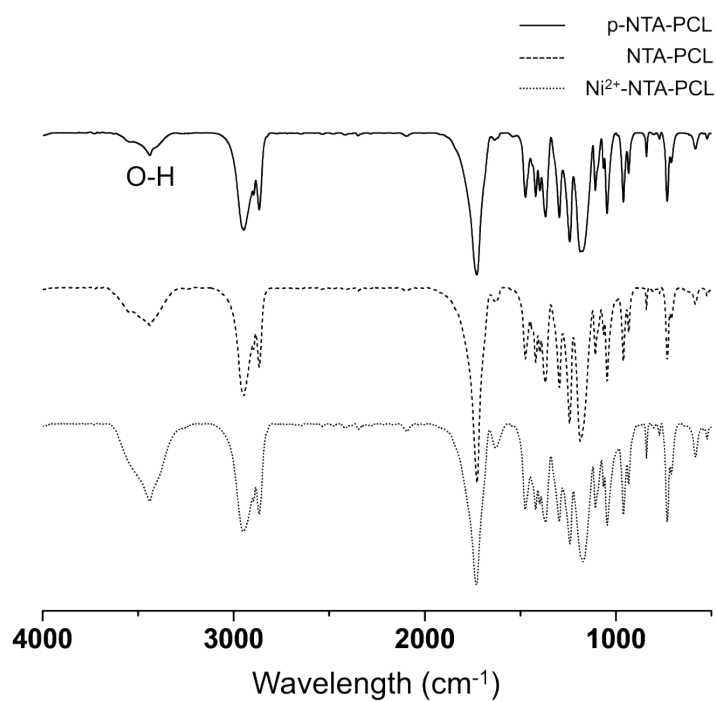

**Figure S3.** IR spectra of polymers in each step of synthesis.

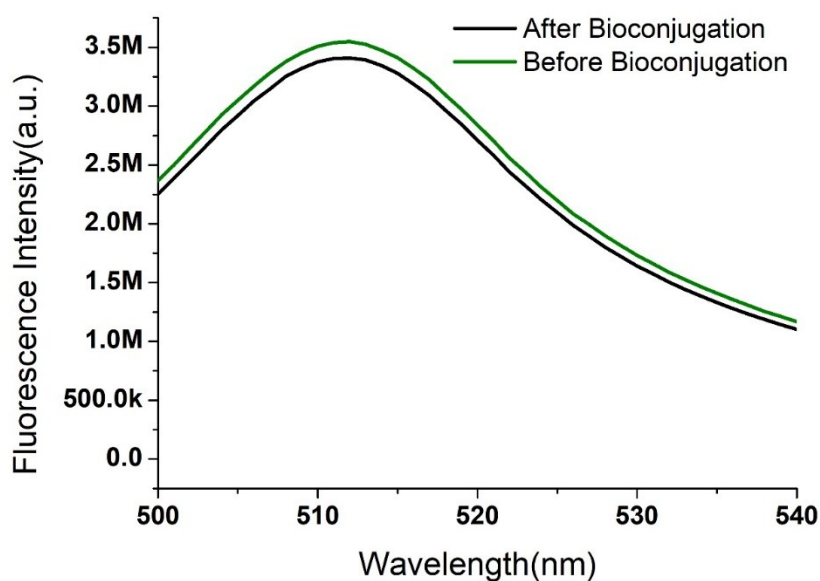

**Figure S4.** Fluorescence of GFP after bioconjugation showed the fluorescent property of GFP was hardly affected by conjugation.

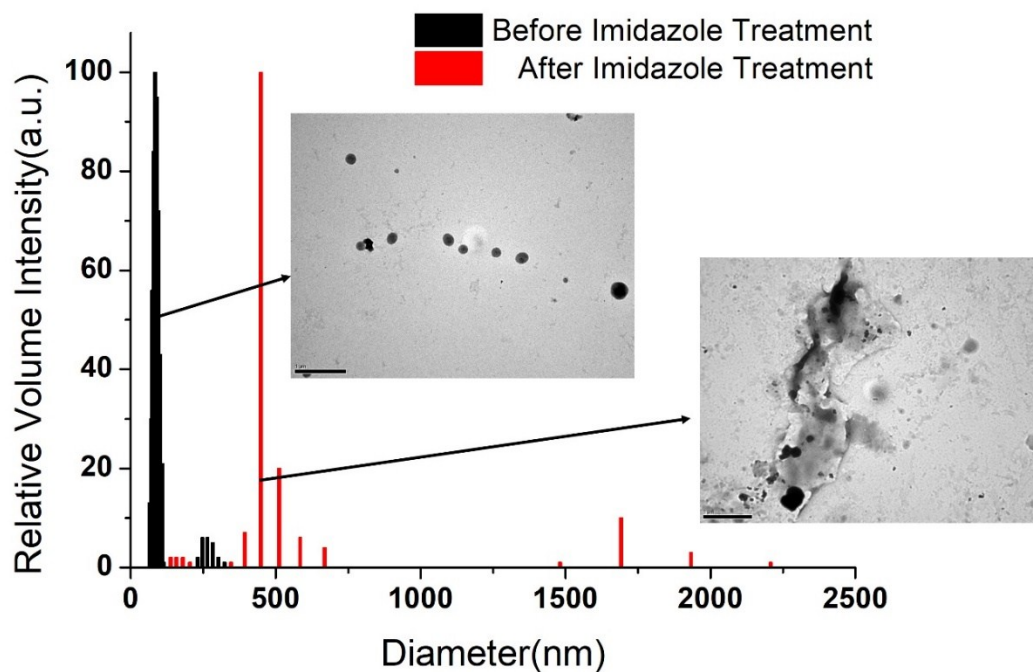

**Figure S5.** Size distribution of GFP/PCL nano-carriers before and after Imidazole treatment. In inset TEM images of GFP/PCL under corresponding imidazole conditions are shown.

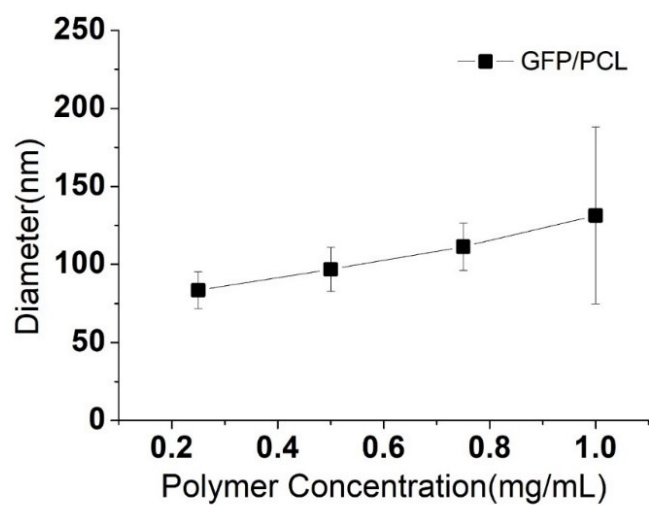

**Figure S6.** Size controllability of GFP/PCL nano-carriers with polymer concentration.

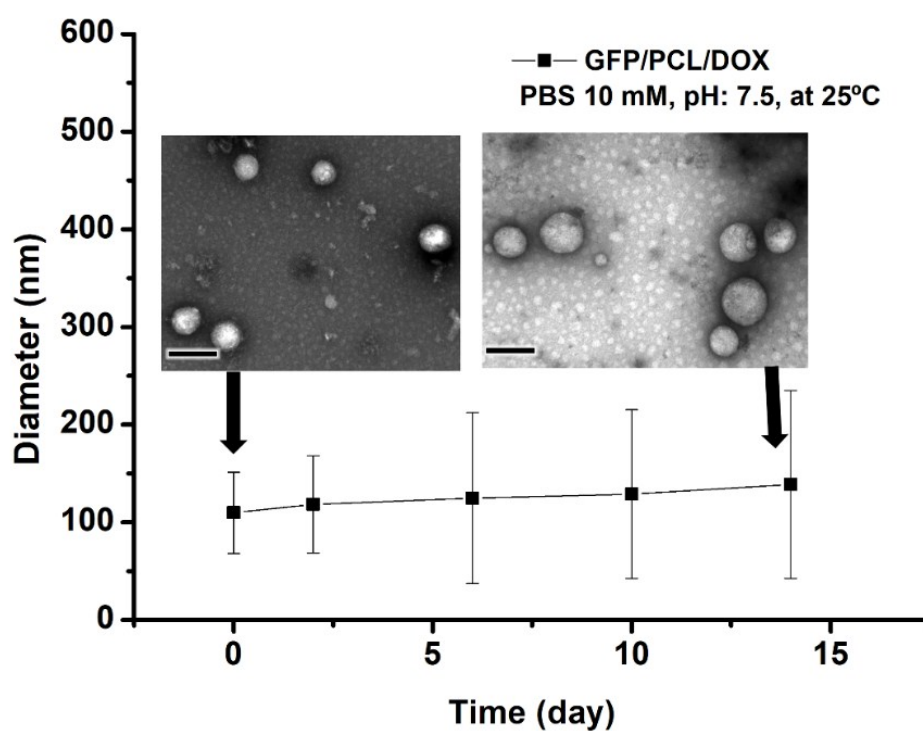

**Figure S7.** Stability study of GFP/PCL/DOX nanoparticles in PBS (pH 7.5, at 25 °C). Inset TEM image taken in the day 0 and day 14. Scale: 200 nm.

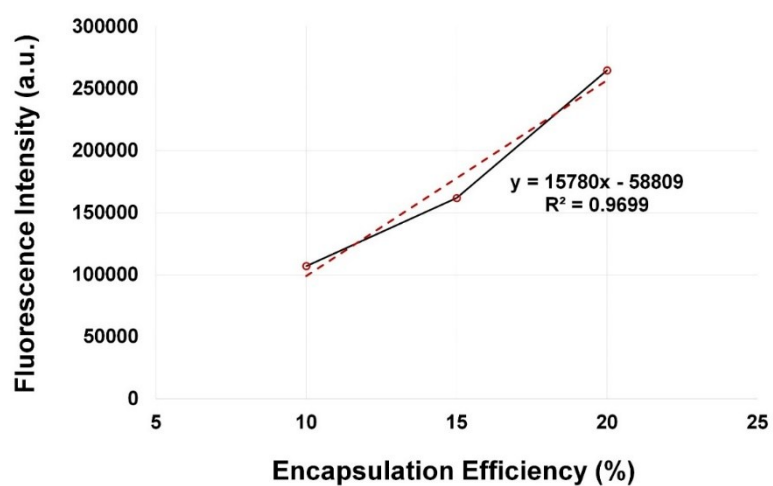

**Figure S8.** Standard curve plotted with emission intensity of DOX solution containing PCL and GFP. Excitation: 480nm, Emission: 590nm.

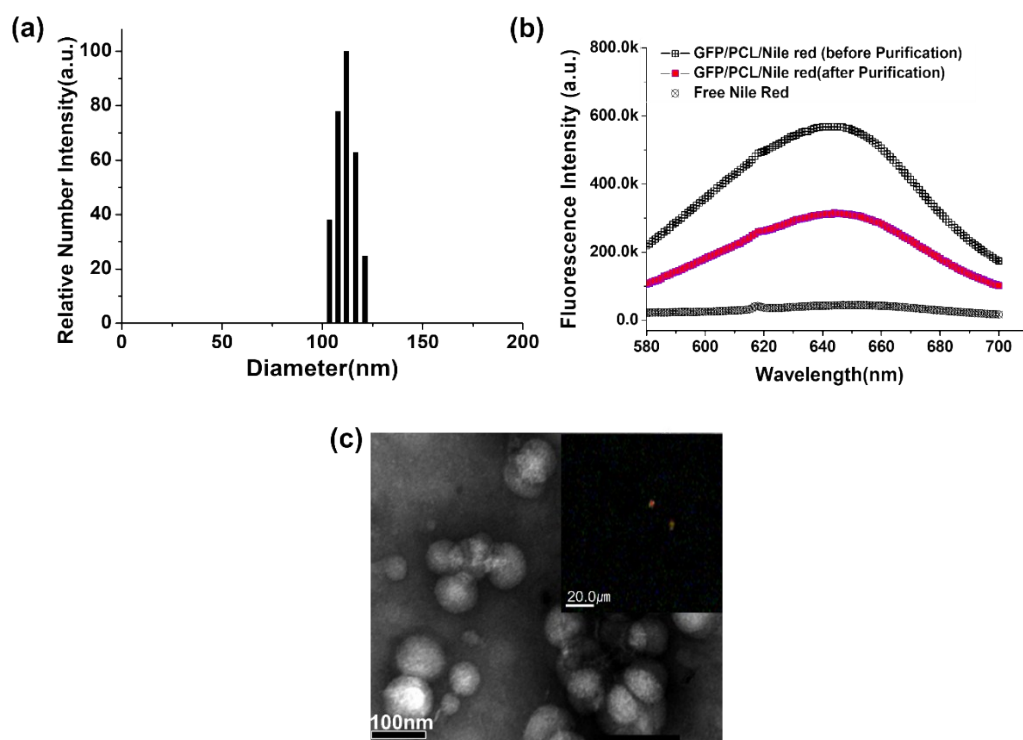

**Figure S9.** Characterization of GFP/PCL/Nile red nanoparticles (a) DLS, (b) PL

spectroscopy data of GFP/PCL/Nile red. From the graph, the encapsulation efficiency is calculated to be 44.8 %. (c) TEM data (inset: fluorescence micrograph of GFP/PCL/Nile red)

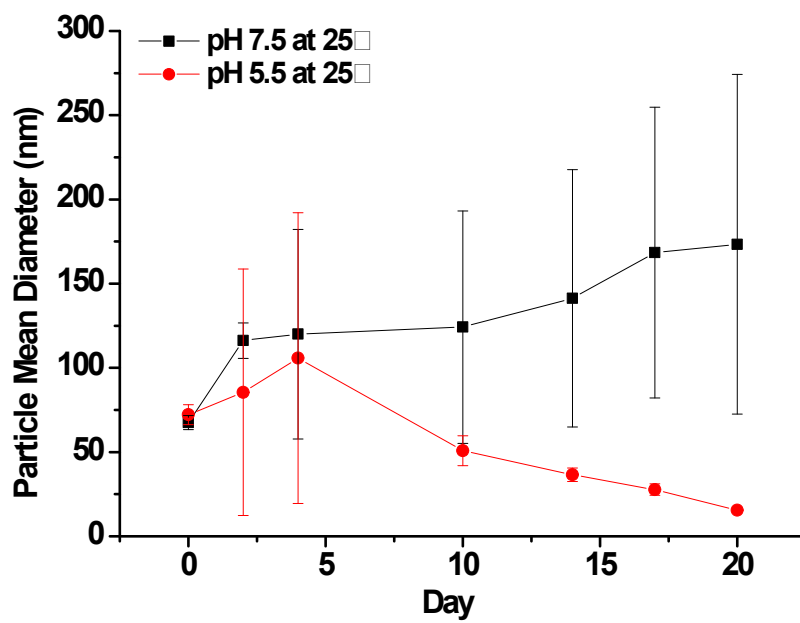

**Figure S10.** DLS study of GFP/PCL/DOX at different PH environment

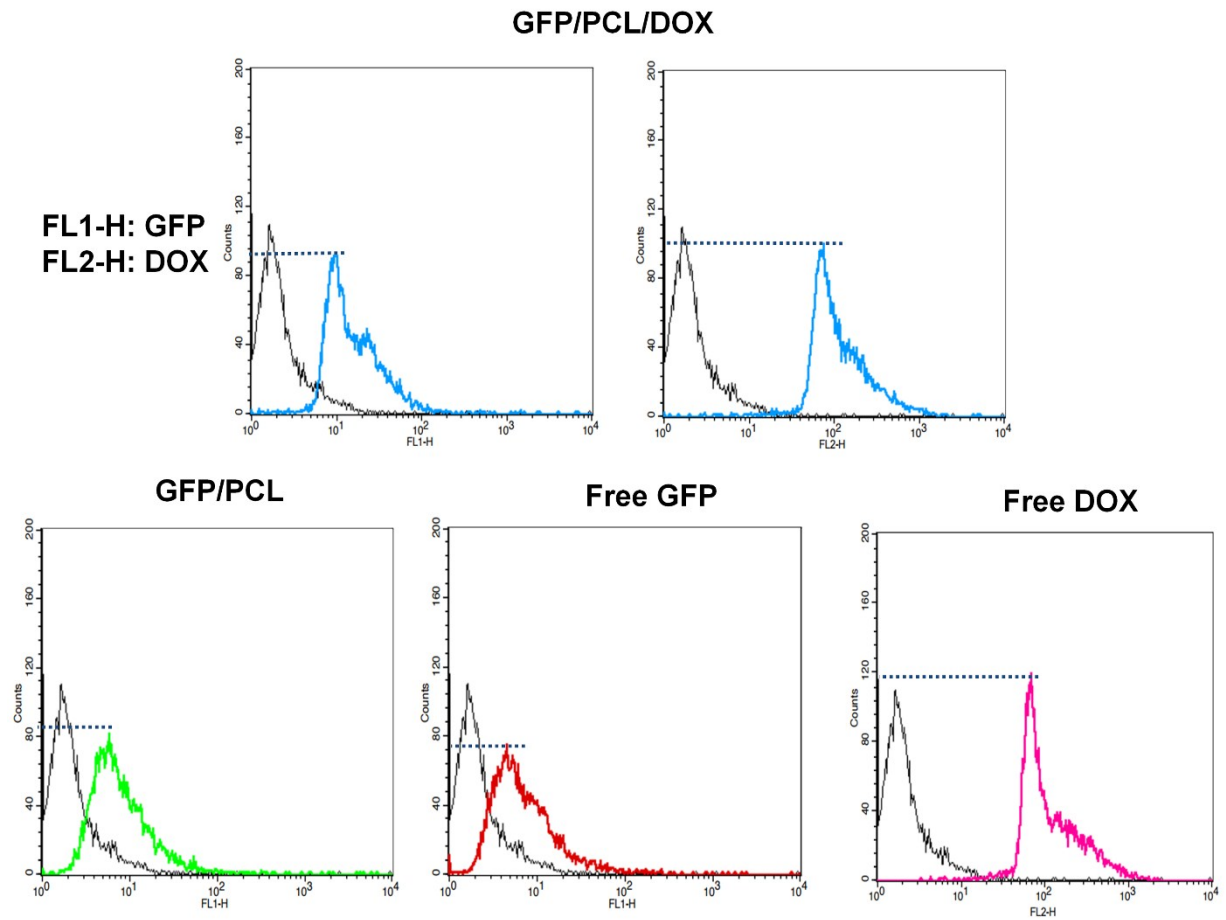

**Figure S11.** Fluorescent intensity of control (black), GFP/PCL/DOX (blue), GFP/PCL (green), free GFP (red) and free DOX (pink) in SH-SY5Y cells evaluated by FACS (Fluorescence Activated Cell Sorting) analysis.
